# Supplementary material for: Incorporation of iodates into hydroxyapatites: a new approach for the confinement of radioactive iodine
Source: Royal Society of Chemistry journal article supplement (doi:10.1039/c1jm14157k), 2011-01-01
Supplement: c1jm14157k.pdf [file c1jm14157k.pdf]

## **Incorporation of iodates into hydroxyapatites: a new approach for the confinement of radioactive iodine**

L. Campayo, A. Grandjean, A. Coulon, R. Delorme, D. Vantelon and D. Laurencin

### **Supplementary Materials**

- p. S2: Description of the synthesis of CaI-HA  
Table S1: Elemental composition of CaI-HA
- p. S3: Description of the sorption tests (suspension of Ca-HA in an iodate solution)  
Figures S1 and S2: XRD and  $^1\text{H}$  NMR characterizations of the Ca-HA powder after suspension in an iodate solution.
- p. S4: Experimental details on the characterization methods used.
- p. S5: Figure S3: (a) Comparison of the I  $\text{L}_3$ -edge XANES spectra of  $\text{NaIO}_3$ ,  $\text{KIO}_3$  and CaI-HA, and (b) comparison of the local environment of the iodate in  $\text{NaIO}_3$  and  $\text{KIO}_3$ .
- p. S6: Experimental details for the leaching tests.
- p. S7: Figure S4: TGA analysis of CaI-HA.  
Figure S5: Leaching test on CaI-HA

## Description of the synthesis of CaI-HA

Samples were prepared from  $\text{Ca}(\text{NO}_3)_2 \cdot 4\text{H}_2\text{O}$  (Alfa Aesar, Germany, 99,0% purity),  $(\text{NH}_4)_2\text{HPO}_4$  (VWR, France, 99,1% purity) and  $\text{NaIO}_3$  (Alfa Aesar, Germany, 99,0% purity). Syntheses were carried out using ultrapure water, and concentrated  $\text{NH}_4\text{OH}$  (Merck) was used to maintain the pH of the solution, either as a 25 wt % solution in water, or after dilution to a  $1 \text{ mol.L}^{-1}$  solution. All reactions were performed under an  $\text{N}_2$  atmosphere. The relative amounts of reactants used for the synthesis of CaI-HA are summarized below, in Table S1.

|                     | Introduced in solution |            | Measured in the solid |            |
|---------------------|------------------------|------------|-----------------------|------------|
| <i>Atom % ratio</i> | <b>Ca/P</b>            | <b>I/P</b> | <b>Ca/P</b>           | <b>I/P</b> |
| <i>CaI-HA</i>       | 1.66                   | 0.33       | 1.62                  | 0.11       |

**Table S1**

The syntheses were carried out as follows, following a procedure adapted from the literature (see reference 13 in the main text).

First, 50 mL of an aqueous solution of calcium nitrate were prepared ( $[\text{Ca}^{2+}] = 0.216 \text{ mol.L}^{-1}$ ; pH adjusted to  $\sim 10.0$  using a  $1 \text{ mol.L}^{-1}$  solution of  $\text{NH}_4\text{OH}$ ). On the other hand, 50 mL of an aqueous solution of  $(\text{NH}_4)_2\text{HPO}_4$  were prepared ( $[\text{P}] = 0.130 \text{ mol.L}^{-1}$ ; the pH was also adjusted to 10.0 by addition of concentrated  $\text{NH}_4\text{OH}$ ). For the preparation of the CaI-HA sample, sodium iodate<sup>1</sup> was dissolved in this alkaline phosphate solution, using an I/P molar ratio of 0.33.

The calcium solution was heated to  $90^\circ\text{C}$  under an  $\text{N}_2$  atmosphere. The solution containing phosphate (and iodate) anions was then added dropwise to it. This led to the progressive precipitation of a white solid. The suspension was stirred at  $90^\circ\text{C}$  (temperature measured directly inside the reaction medium) for a total time of 5 hours, during which small amounts of concentrated  $\text{NH}_4\text{OH}$  were regularly added, in order to keep the pH close to its initial value. The reaction medium was then left to cool at room temperature, and the solid was recovered by filtration before being dried at  $120^\circ\text{C}$  overnight. This solid was then washed to remove soluble by-products and physisorbed species like nitrate ions. The washing procedure consisted in a magnetic stirring of a  $5 \text{ g.L}^{-1}$  suspension of the powder in ultrapure water for one hour (typically, 1 g of the product collected after drying was suspended with 200 mL of ultrapure water). The suspension was filtered and the solid ultimately dried at  $90^\circ\text{C}$  during at least 16 hours. After the complete treatments,  $\sim 1 \text{ g}$  of solid was obtained, which corresponds to a yield of  $\sim 87\%$  assuming the formation of  $\text{Ca}_{10}(\text{PO}_4)_6(\text{OH})_{1.4}(\text{IO}_3)_{0.6}$  (as explained in the main text).

<sup>1</sup> It is noteworthy that  $\text{NH}_4(\text{IO}_3)$  can also be used as an iodate precursor in this synthesis.

## Description of the sorption tests

A pristine hydroxyapatite ( $\text{Ca}_{10}(\text{PO}_4)_6(\text{OH})_2$ , Ca-HA) was prepared according to the procedure described above. This powder was used for a sorption test.

1 g of the dried powder was dispersed in 200 mL of an aqueous solution containing sodium iodate ( $[\text{IO}_3^-] = 0.043 \text{ mol.L}^{-1}$ ) at a pH value of  $\sim 10.0$  (using a using a  $1 \text{ mol.L}^{-1}$  solution of  $\text{NH}_4\text{OH}$ ). It is worth noting that the iodate concentration and the pH value were chosen to be similar to those used for the synthesis of CaI-HA. The suspension was stirred at  $90^\circ\text{C}$  for a total time of 5 hours, during which small amounts of concentrated  $\text{NH}_4\text{OH}$  were regularly added, in order to keep the pH close to its initial value. The suspension was subsequently cooled and then filtered. Iodine was measured out in the leaching solution according to the same procedure as described for the leaching tests carried on substituted HA (see the section on the “Experimental details for the leaching tests”). Within the uncertainty range of the iodide selective electrode used for this characterization, no difference was found between initial and final iodine content in the solution, meaning that the amount of iodine sorbed at the grain surface is low. This amount is assessed to be below 1 wt. % which, in first approach, can be considered as negligible by comparison with the amount found in CaI-HA. From these results, it is concluded that in the case of CaI-HA, the iodate anions are mainly located inside the crystalline lattice of HA.

Figure S1 : XRD<sup>2</sup>

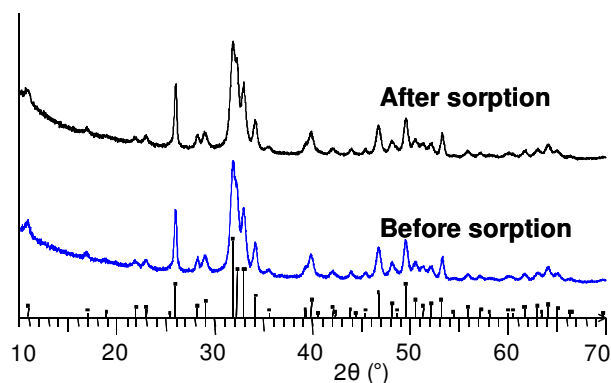

Figure S2 :  $^1\text{H}$  solid state NMR<sup>3</sup>

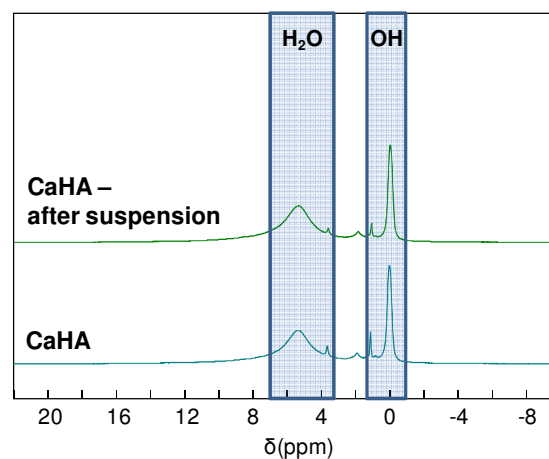

<sup>2</sup> The vertical lines correspond to the indexing of the Ca-HA crystal structure.

<sup>3</sup> The sharp peaks of very low intensity are likely to correspond to remaining solvent impurities.

## Experimental details on the characterization methods used

X-Ray diffraction powder patterns were acquired on a PanAnalytical diffractometer equipped with an ultra-fast X'celerator detector X'pert Pro, and using the Cu K $\alpha$  radiation ( $\lambda = 1.5405 \text{ \AA}$ ). The experimental diffractograms were analysed using the EVA (Bruker, version 12.0 rev 0) and Checkcell (release of 11/01/2004) softwares. The background was subtracted, and the Cu K $\alpha_2$  contribution was removed.

Raman spectra were measured on a Horiba Jobin Yvon LabRam Aramis apparatus and IR spectra on a Bruker Vertex 70 spectrometer.

The  $^{31}\text{P}$  solid state magic-angle spinning (MAS) NMR spectra shown in Figure 1b were recorded on a Bruker Ultrashield 400 MHz spectrometer, using a 4 mm MAS probe, and spinning at 12 kHz. Single-pulse spectra were collected using a recycle delay of 30 s. The  $^1\text{H}$  MAS NMR spectra shown in Figures 2d<sup>4</sup> and S2 were recorded on a Varian 600 MHz NMR spectrometer, using a 3.2 mm MAS probe spinning at 20 kHz. A DEPTH sequence was used to suppress probe background  $^1\text{H}$  signals.<sup>5</sup> 16 transients were acquired, and a recycle delay of 10 s was used to ensure full relaxation of the  $^1\text{H}$  signals.  $^1\text{H}$  and  $^{31}\text{P}$  chemical shifts were referenced using TMS ( $\text{Si}(\text{CH}_3)_4$ , resonance at 0 ppm) and  $\text{NH}_4\text{H}_2\text{PO}_4$  (resonance at 0.9 ppm), respectively.

Thermogravimetric analysis (TGA) was carried out in a TG-DTA 92-16 (Setaram) thermobalance with a heating rate of 10 °C/min (see Figure S4). About 20.9 mg of solid sample was used, and the Argon flow used was 1000 cm<sup>3</sup>/h.

I L<sub>3</sub>-edge XANES (X-ray Absorption Near Edge Structure) measurements were performed on the LUCIA beamline at the Soleil Synchrotron (Saint-Aubin, France). The Soleil ring energy was 2.75 GeV and the current was 400 mA. Samples were ground to a fine powder, diluted in cellulose, pressed into pellets, and run at ~75 K in transmission mode. Spectra were collected at the I L<sub>3</sub>-edge. The X-ray incident energy on the sample was defined using a double-crystal Si(111) monochromator. The instrument was evacuated to  $\sim 10^{-8}$  Pa during the measurements. The pre-edge (4500–4552 eV), edge (4552.2–4632 eV) and post-edge (4633–4820 eV) regions were scanned in 5.0, 0.2 and 1.0 eV steps respectively, with dwell times per point of 2.0 to 4.0 s. Data reduction was performed using the Athena software package.<sup>6</sup> Typically, 2 to 3 XANES data sets were collected for each sample, which were averaged and normalised with Athena.

<sup>4</sup> The amount of Ca-Ha and CaI-HA samples introduced in the rotors was weighed, in order to estimate quantitatively the decrease in relative intensity of the OH peak in CaI-HA.

<sup>5</sup> D. G. Cory and W. M. Ritchey, *J. Magn. Reson.* 1988, **80**, 128.

<sup>6</sup> B. Ravel, and M. Newville, ATHENA, ARTEMIS, HEPHAESTUS: data analysis for X-ray absorption spectroscopy using IFEFFIT. *J. Synchrotron Radiat.* 2005, **12**, 537.

**Figure S3:**

**(a) Comparison of the I L<sub>3</sub>-edge XANES spectra of NaIO<sub>3</sub>, KIO<sub>3</sub> and CaI-HA.**

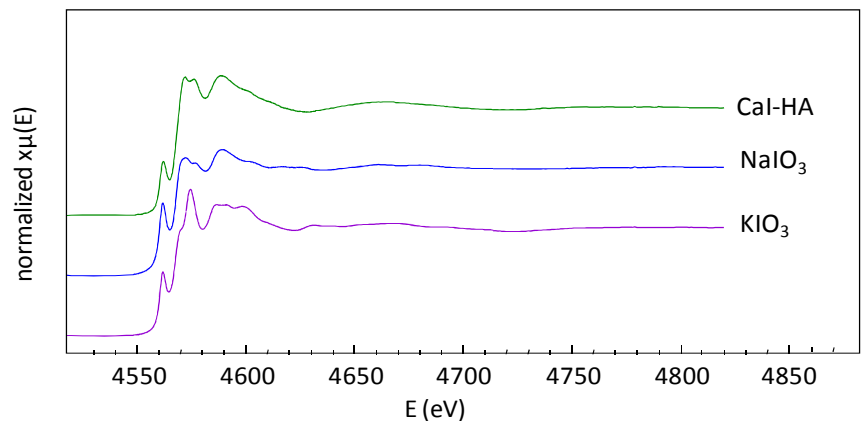

**(b) Comparison of the local environment of the iodate in NaIO<sub>3</sub> and KIO<sub>3</sub>.**

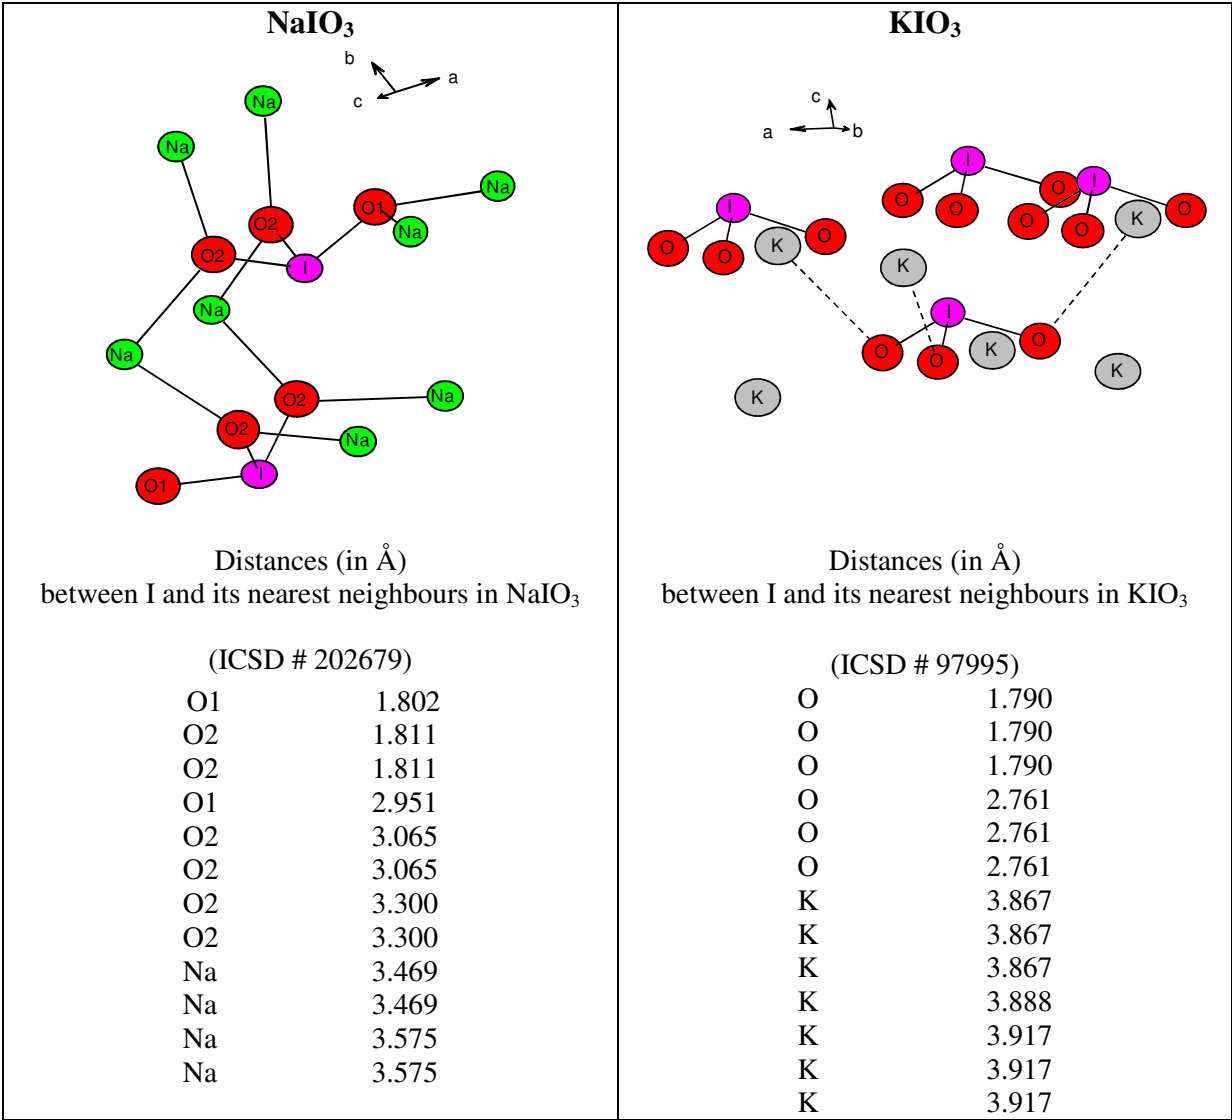

## Experimental details for the leaching tests.

The protocol used to study the resistance of an iodate substituted apatite to aqueous alteration was adapted from a standard test for powders, as described below.

The ratio surface of powder to water volume used was  $460 \text{ cm}^{-1}$ , due to the high specific surface area of CaI-HA ( $92 \text{ m}^2 \cdot \text{g}^{-1}$ ). The apatite powder was introduced into 1 L of pure water and heated at  $90^\circ\text{C}$ . The leaching solution was renewed regularly with the ratio  $S/V$  kept constant. At each renewal, the solid was dried and weighed to ensure a correct renewal of the volume of water (specific surface area is considered constant and equal to its initial value). At each step, the iodine concentration in the leachate was measured.

The iodine concentration was determined using an iodide selective electrode (Thermo Scientific). Given that the iodine is released from the powder in the leaching solution under the form of iodates, these ions were first reduced in iodide according to the procedure described by Sanders.<sup>7</sup>

The normalized weight loss  $NL_I$  (shown in Figure S5 in the ESI) is the normalized weight loss based on iodine release, in  $\text{g} \cdot \text{m}^{-2}$ . It was calculated using the following equation:

$$NL_I = \frac{C_I}{f_I * S/V}$$

where  $C_I$  is the iodine concentration in the leachate ( $\text{g} \cdot \text{cm}^{-3}$ );  $f_I$  is the mass concentration of iodine in the apatite; and  $S/V$  is the ratio surface of powder to water volume ( $\text{cm}^{-1}$ ).

The dissolution rate  $R_I$  ( $\text{g} \cdot \text{m}^{-2} \cdot \text{d}^{-1}$ ) at time  $t$  is then given by the slope of the normalized weight loss as a function of time  $t$  (d):

$$R_I(t) = \frac{dNL_I}{dt}(t)$$

<sup>7</sup> J. K. Sanders, "Procedure for the determination of total iodine using automated sample preparation and ion chromatography", *LRA*, 1997, **10**, 19-23

**Figure S4: TGA analysis of CaI-HA.<sup>8</sup>**

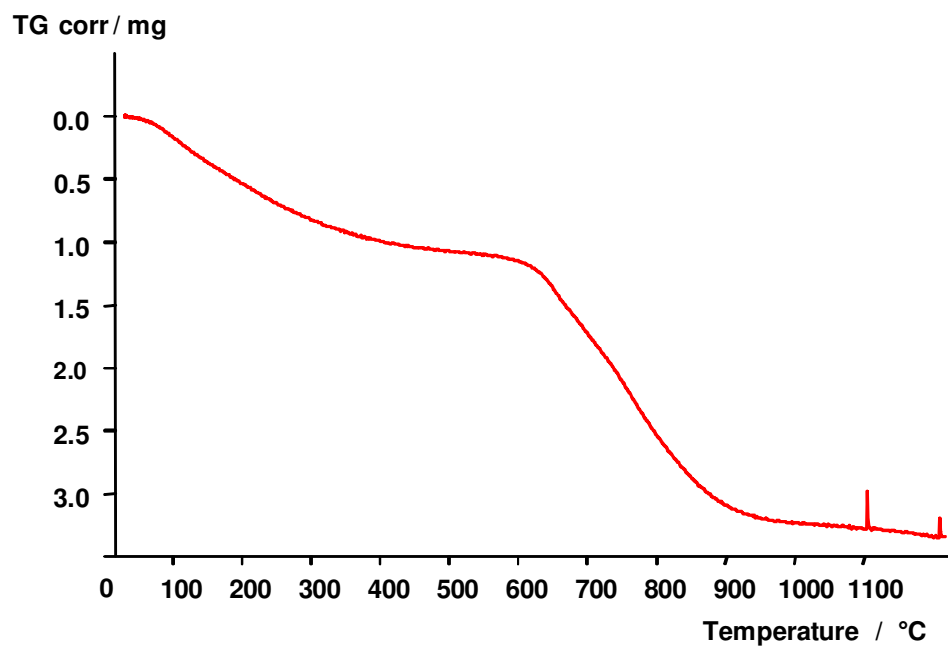

**Figure S5: Normalized weight loss of CaI-HA in a leach test<sup>9</sup>**

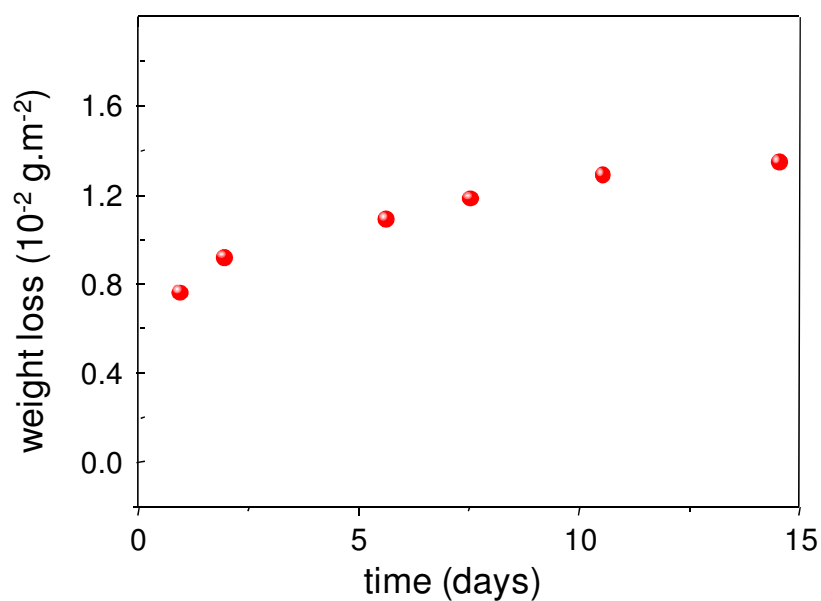

<sup>8</sup> The glitches above 1100 °C are experimental artifacts.

<sup>9</sup> The estimated error for the points on the graph is  $\sim 0.07 \times 10^{-2} \text{ g.m}^{-2}$ .
